# Supplementary material for: TRIAD3/RNF216 E3 ligase specifically synthesises K63-linked ubiquitin chains and is inactivated by mutations associated with Gordon Holmes syndrome
Source: PubMed Central journal article supplement (PMC6411869; doi:10.1038/s41420-019-0158-6), 2019-03-11

# Supplementary Figure 2

## A

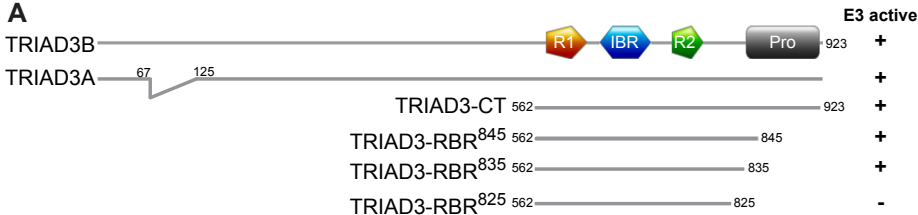

## B

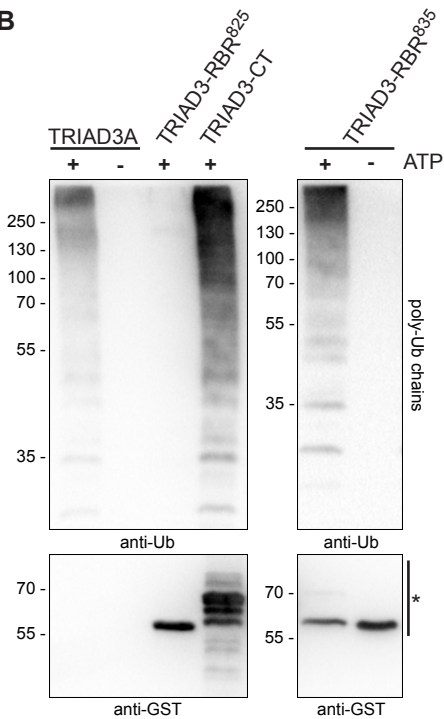

Supplement: 41420_2019_158_MOESM2_ESM.pdf [file 41420_2019_158_MOESM2_ESM.pdf]
